# Supplementary material for: Dual enzyme-like Co–FeSe2nanoflowers with GSH degradation capability for NIR II-enhanced catalytic tumor therapy
Source: Royal Society of Chemistry journal article supplement (doi:10.1039/d3tb00220a), 2023-01-01
Supplement: d3tb00220a1.pdf [file d3tb00220a1.pdf]

## Supporting Information

### **Dual Enzyme-like Co-FeSe<sub>2</sub> Nanoflowers with GSH Degradation Capability for NIR II-Enhanced Catalytic Tumor Therapy**

*Jingge Zhang,<sup>a</sup> Enna Ha,<sup>\*a</sup> Danyang Li,<sup>a</sup> Shuqing He,<sup>a</sup> Luyang Wang<sup>b</sup> and Junqing  
Hu<sup>\*a,c</sup>*

<sup>a</sup> College of Health Science and Environmental Engineering, Shenzhen Technology  
University, Shenzhen, Guangdong 518118, PR China

<sup>b</sup> College of New Materials and New Energies, Shenzhen Technology University,  
Shenzhen, Guangdong 518118, PR China

<sup>c</sup> Shenzhen Bay Laboratory, Shenzhen, Guangdong 518055, China

\*Corresponding author e-mail: haenna@sztu.edu.cn; hujunqing@sztu.edu.cn

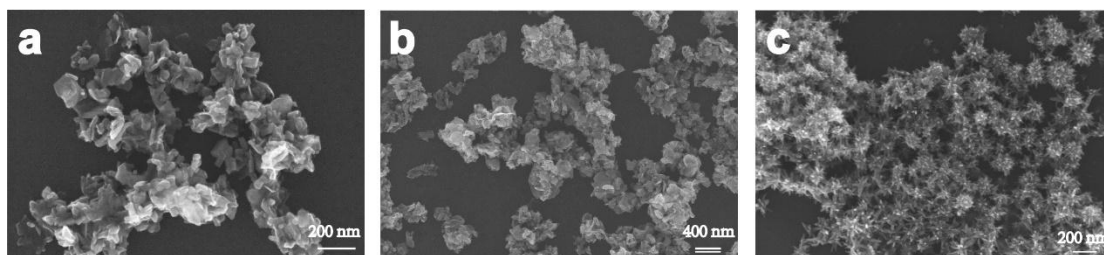

**Fig. S1.** SEM images of different synthetic condition: (a)  $V_{OM}: V_{DDT} = 1:2$ ; (b)  $V_{OM}: V_{DDT} = 1:1$ ; (c)  $V_{OM}: V_{DDT} = 2:1$ .

Table S1 EDS result of Co-FeSe<sub>2</sub>

| Sample | Mass ratio (%) | Atomic ratio (%) |
|--------|----------------|------------------|
| Co     | 1.72           | 2.08             |
| Fe     | 25.49          | 32.42            |
| Se     | 72.79          | 65.50            |

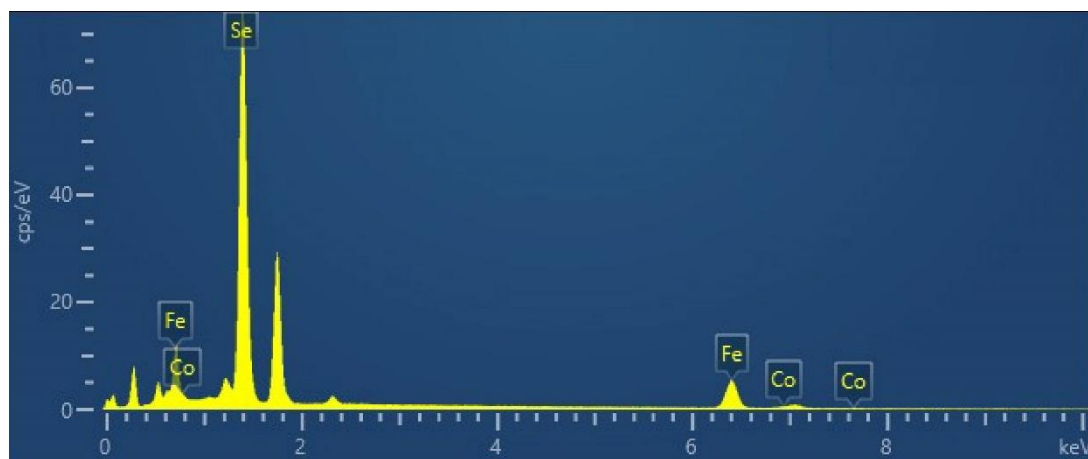

**Fig. S2.** EDS spectrum of Co-FeSe<sub>2</sub> nanozymes.

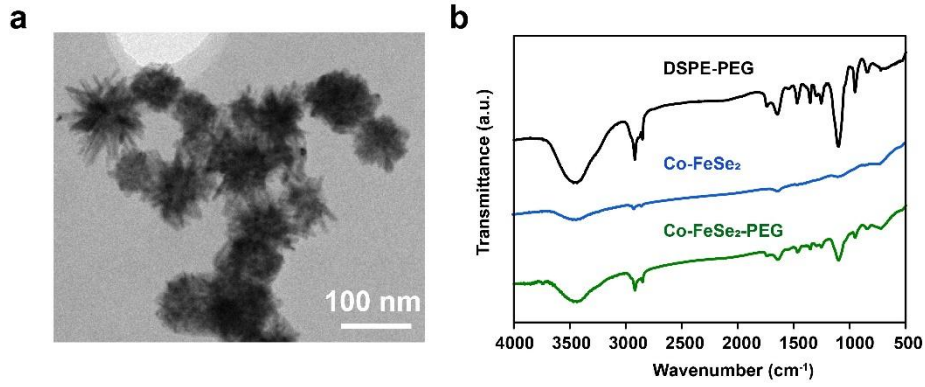

**Fig. S3.** (a) TEM of modified Co-FeSe<sub>2</sub> and (b) FT-IR spectra of DSPE-PEG, Co-FeSe<sub>2</sub>, DSPE-PEG modified Co-FeSe<sub>2</sub>.

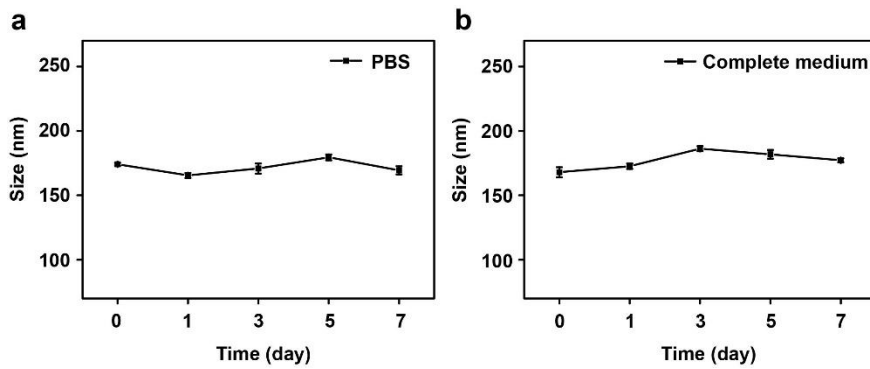

**Fig. S4.** DLS of modified Co-FeSe<sub>2</sub> dispersed in (a) PBS and (b) complete medium within 7 days.

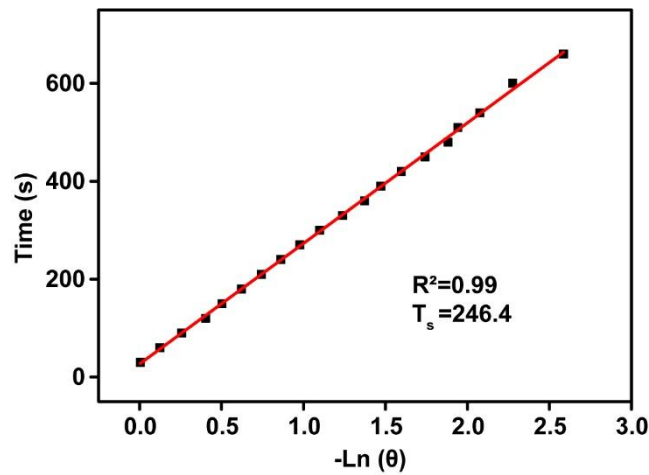

**Fig. S5.** Fitting plots of time versus  $-\ln\theta$  during the cooling period.

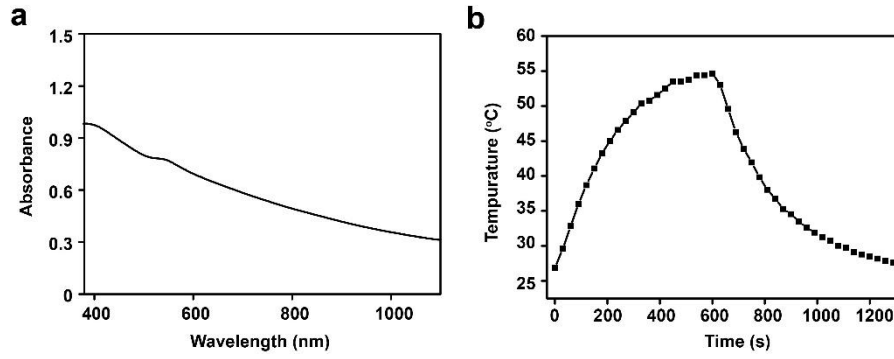

**Fig. S6.** (a) UV-Vis of modified Co-FeSe<sub>2</sub>. (b) Temperature change profile of modified Co-FeSe<sub>2</sub> (1064 nm, 0.8 W/cm<sup>2</sup>).

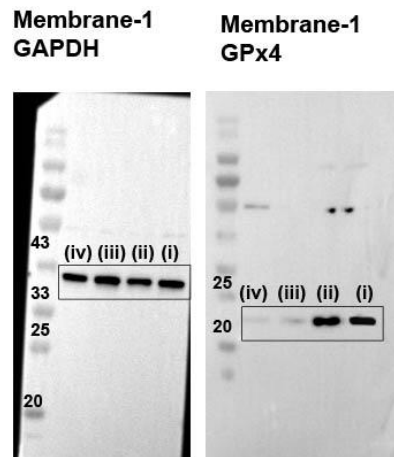

**Fig. S7.** Raw data of western blot experiment. Group i) Control, ii) NIR, 1064 nm, 0.8 W/cm<sup>2</sup>, 10 min, iii) Co-FeSe<sub>2</sub>, 200 μg/mL, iv) Co-FeSe<sub>2</sub>-NIR.

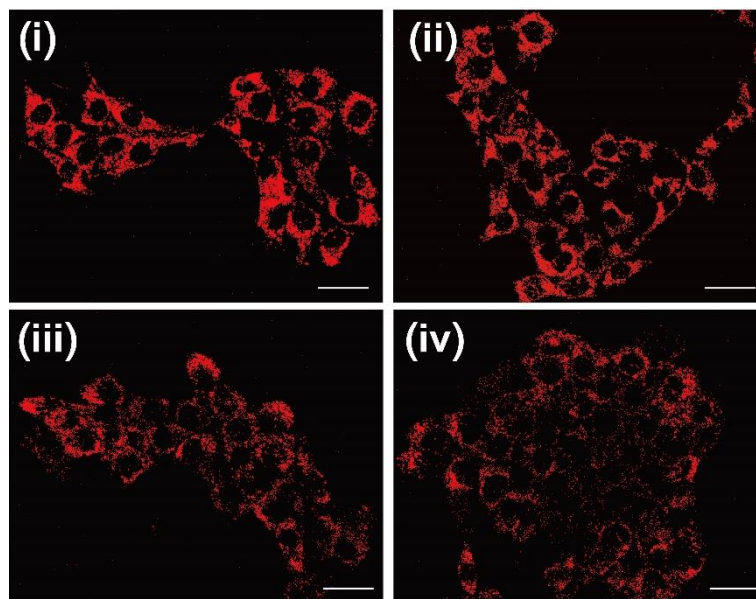

**Fig. S8.** CLSM imaging of mitochondrial morphology in 4T1 cells after different treatments, scale bar: 50 μm. Group i) Control, ii) NIR, 1064 nm, 0.8 W/cm<sup>2</sup>, 10 min, iii) Co-FeSe<sub>2</sub>, 200 μg/mL, iv) Co-FeSe<sub>2</sub>-NIR

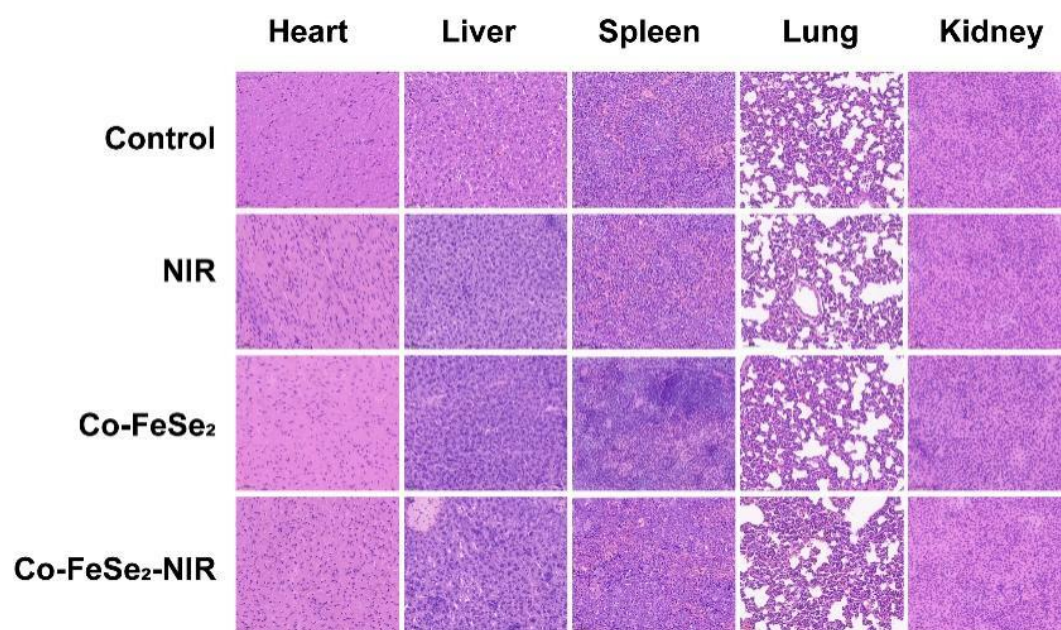

**Fig. S9.** HE staining images of the excised organs (heart, liver, spleen, lung, kidney) of BALB/c tumor-bearing mice at 14<sup>th</sup> day after treatment.
